# Supplementary material for: Composition and activity of nitrifier communities in soil are unresponsive to elevated temperature and CO2, but strongly affected by drought
Source: PubMed Central journal article supplement (PMC7784676; doi:10.1038/s41396-020-00735-7), 2020-08-07
Supplement: 41396_2020_735_MOESM6_ESM.pdf [file 41396_2020_735_MOESM6_ESM.pdf]

# CLIMGRASS sampling site

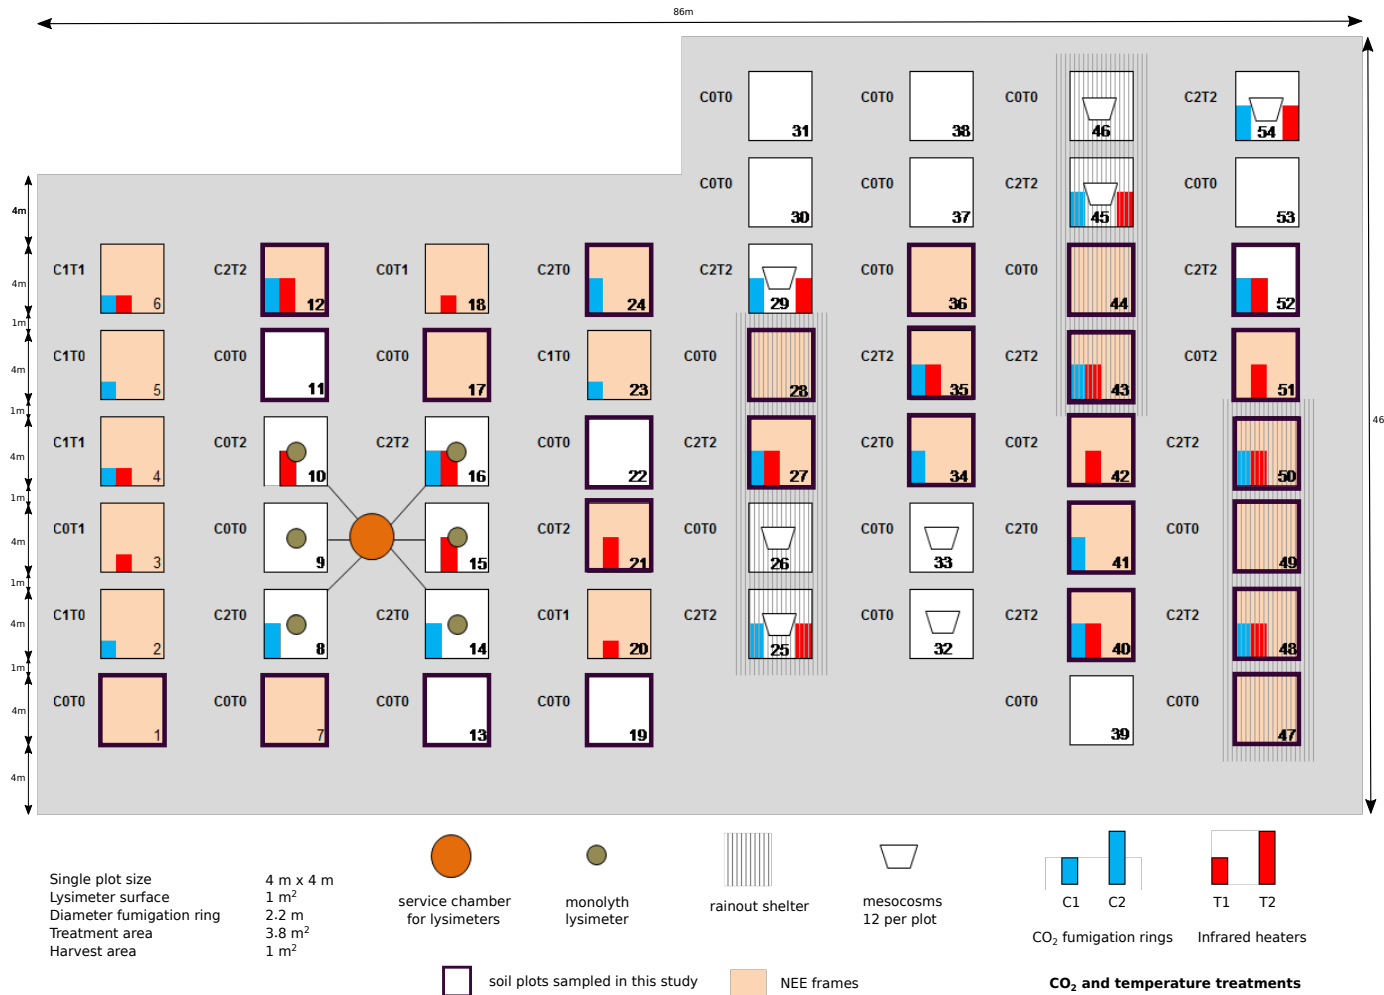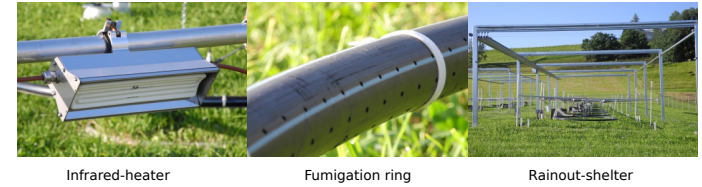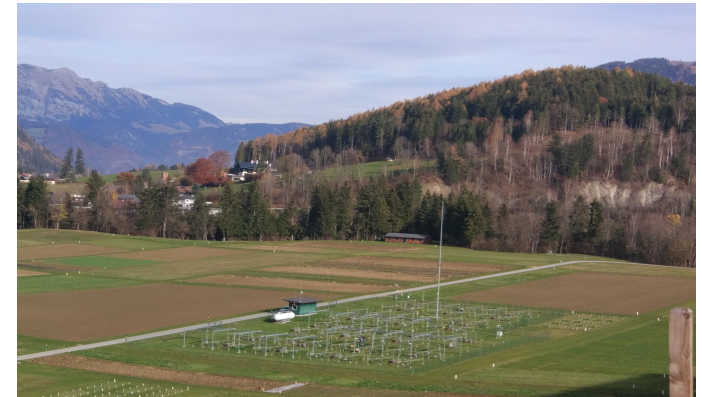

View of the field site. Photo credits: Joana Séneca

**Figure S1:** Spatial arrangement of all plots from the Climgrass experimental site at HBLFA-Raumberg-Gumpenstein. The interdisciplinary teams involved in this project aim to monitor nutrient dynamics and changes on the hydrological, carbon and nitrogen cycles in montane grasslands, within a climate change scenario. For this experimental site, a completely randomized response surface design was used, which allows a more efficient estimation of treatment effects due to a more parsimonious modelling (Piepho et al. 2017). Rainout shelters were used to simulate drought, CO<sub>2</sub> fumigation rings increased atmospheric CO<sub>2</sub> levels by 150 ppm (C1) and 300 ppm (C2) above ambient conditions. Six infrared heaters per plot increased the soil temperature by 1.5 °C (T1) and 3 °C (T2) above ambient temperature. Out of 54 plots, 26 were sampled and analysed in this study. Sampled soil plots comprised the highest level of elevated temperature (+ 3 °C) and atmospheric CO<sub>2</sub> (+ 300 ppm) manipulations alone or in combination. Additionally, soil plots with rain-out shelters from ambient and from the most extreme combination of temperature and CO<sub>2</sub> were also sampled. More details regarding the sampling site and the maintenance of the facility are described in the Material and Methods section and on the website below.

Copyrights: HBLFA-Raumberg Gumpenstein. Figure availability: <https://climgrass.at/experimental-site.html>

## Summary of plots sampled in this study

| Plot code | Treatment conditions        | Plot number           |
|-----------|-----------------------------|-----------------------|
| c0t0      | [Amb]                       | 1,7,11,13,17,19,22,36 |
| c0t2      | [eT]                        | 21,42,51              |
| c2t0      | eCO <sub>2</sub>            | 24,34,41              |
| c2t2      | [eT] × [eCO <sub>2</sub> ]  | 12,35,40,52           |
| c0t0      | [Amb] × [D]                 | 28,44,47,49           |
| c2t2      | [eTeCO <sub>2</sub> ] × [D] | 27,43,48,50           |
