# Supplementary material for: Composition and activity of nitrifier communities in soil are unresponsive to elevated temperature and CO2, but strongly affected by drought
Source: PubMed Central journal article supplement (PMC7784676; doi:10.1038/s41396-020-00735-7), 2020-08-07
Supplement: 41396_2020_735_MOESM10_ESM.pdf [file 41396_2020_735_MOESM10_ESM.pdf]

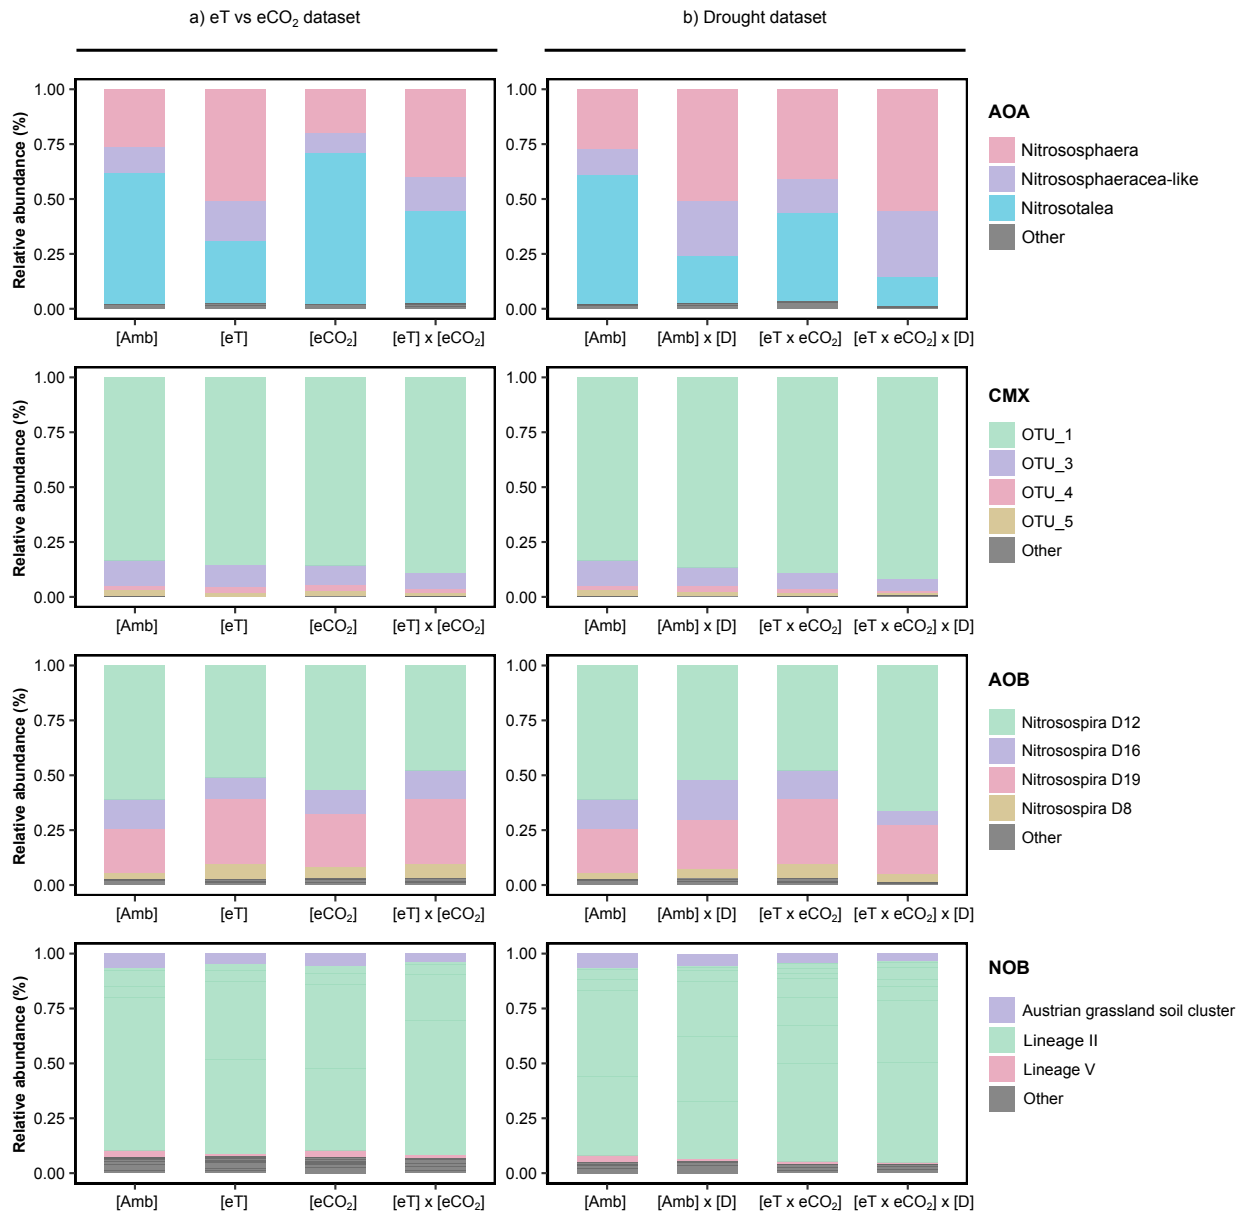

**Figure S5.** Relative abundance (%) of all nitrifying groups obtained by *amoA* and *nxB* gene sequencing in plots with single and interactive effects of elevated temperature (eT) and atmospheric CO<sub>2</sub> (eCO<sub>2</sub>) concentration – (A); and plots with single and interactive effects of future climate conditions (eT x eCO<sub>2</sub>) and drought (D) – (B). The color code represents different genera/OTUs/clades/lineages. Multiple horizontal lines within the same color represent individual OTUs within a group. Taxa that comprised less than 0.1% of all reads per treatment are grouped as ‘Other’.
